# Supplementary material for: Genome-Wide Analysis Identifies Candidate Genes Encoding Feather Color in Ducks
Source: MDPI journal article supplement (doi:10.3390/genes13071249), 2022-07-14
Supplement: s1 [file s1]

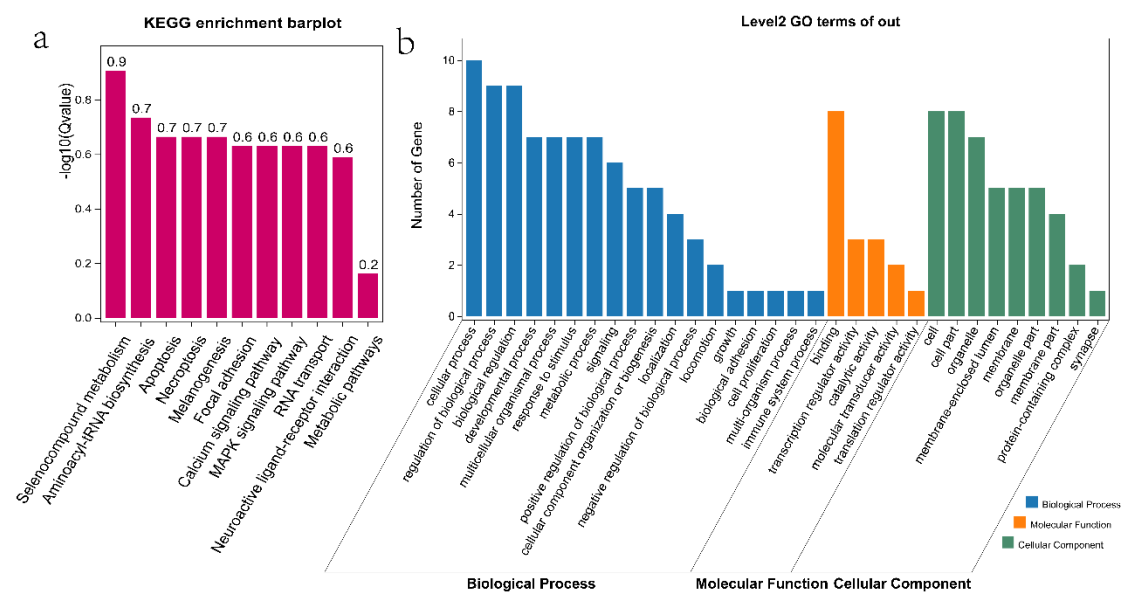

**Figure S1.** KEGG (a) and GO (b) enrichment analysis of black plumage associate genes.

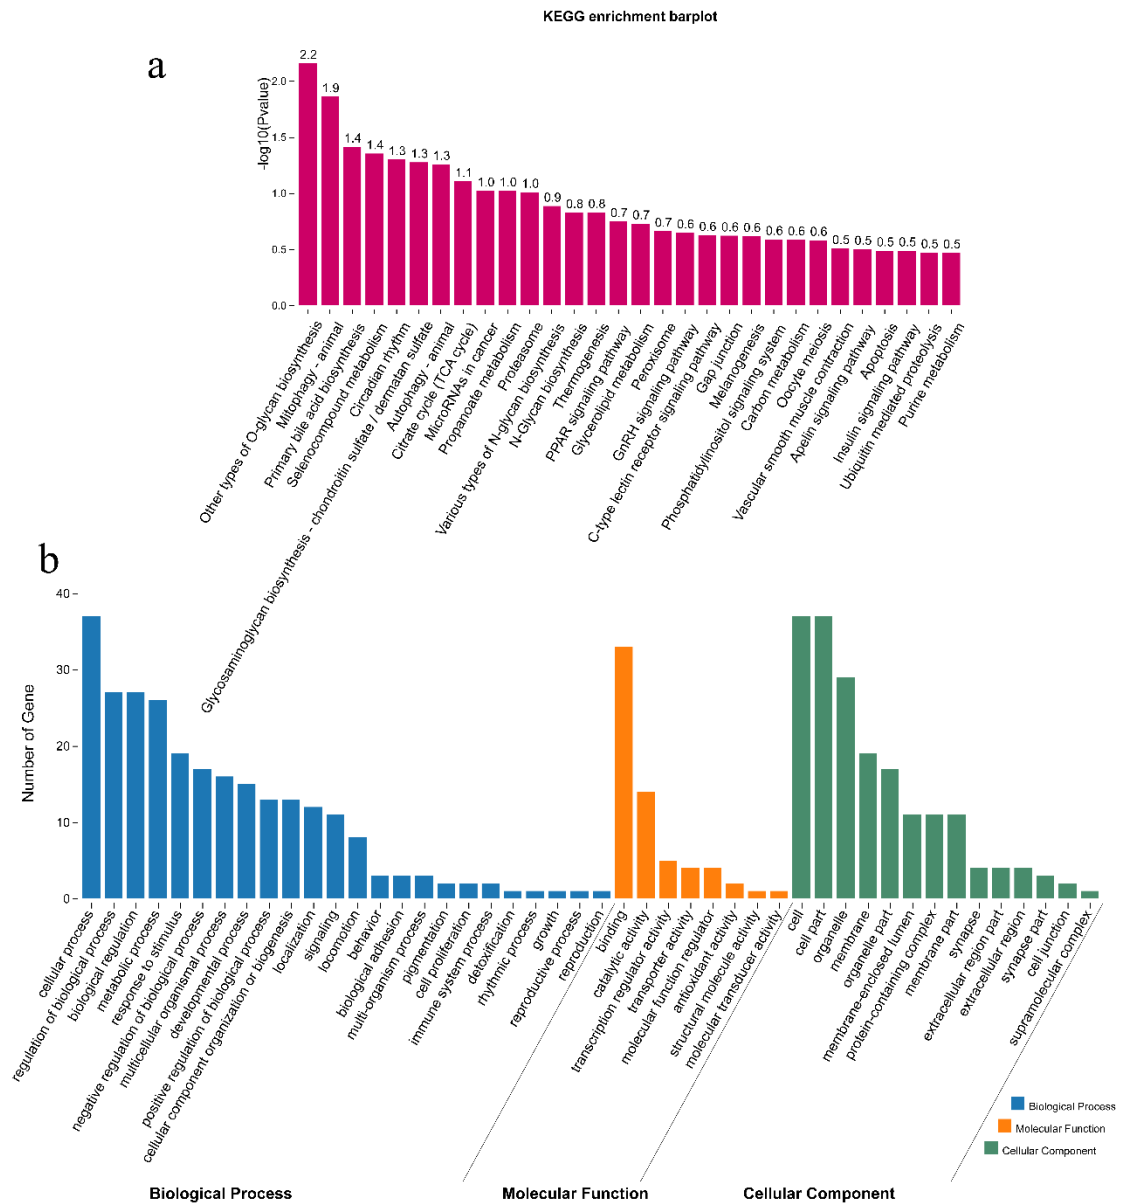

**Figure S2.** KEGG (a) and GO (b) enrichment analysis of white plumage associate genes.

# KEGG enrichment barplot

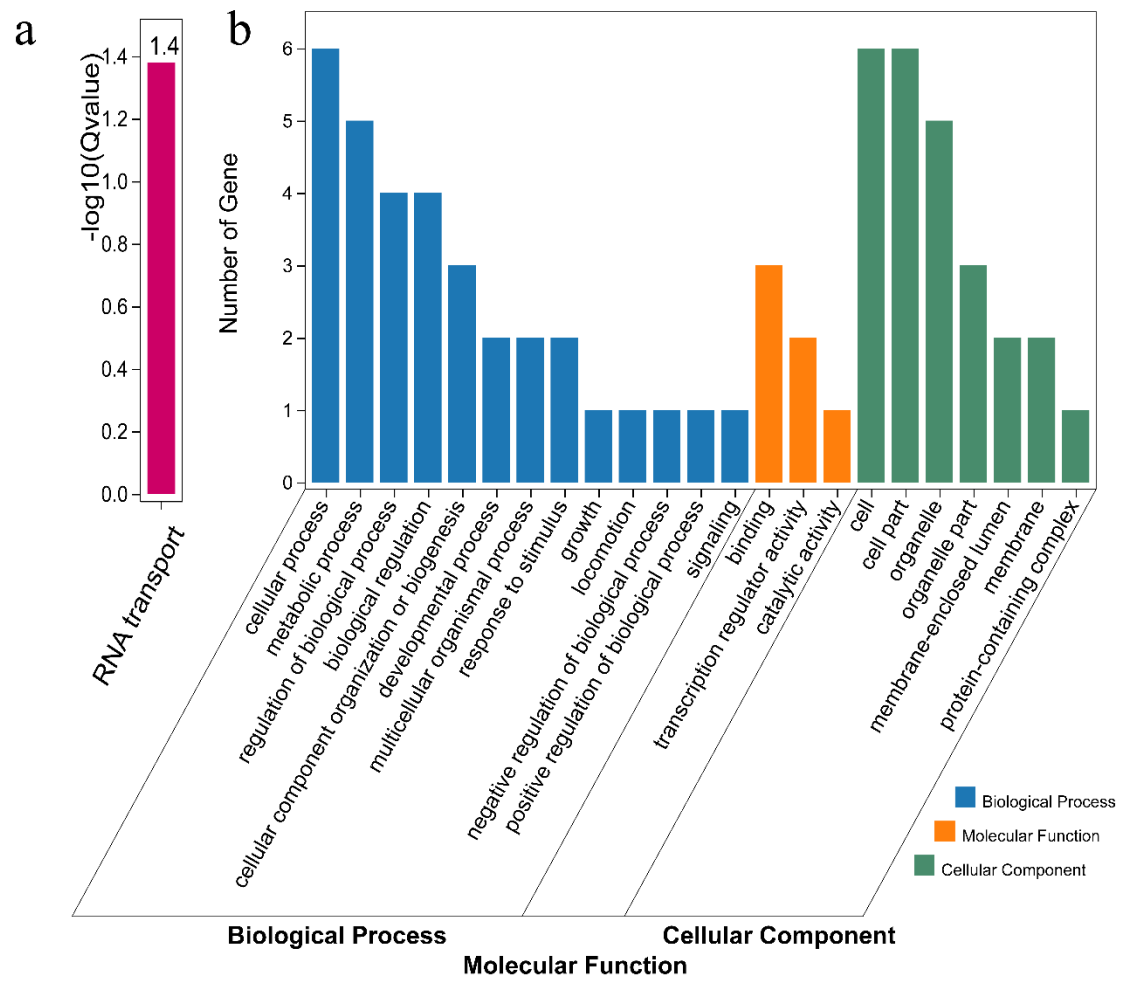

**Figure S3.** KEGG (a) and GO (b) enrichment analysis of spot plumage associate genes.

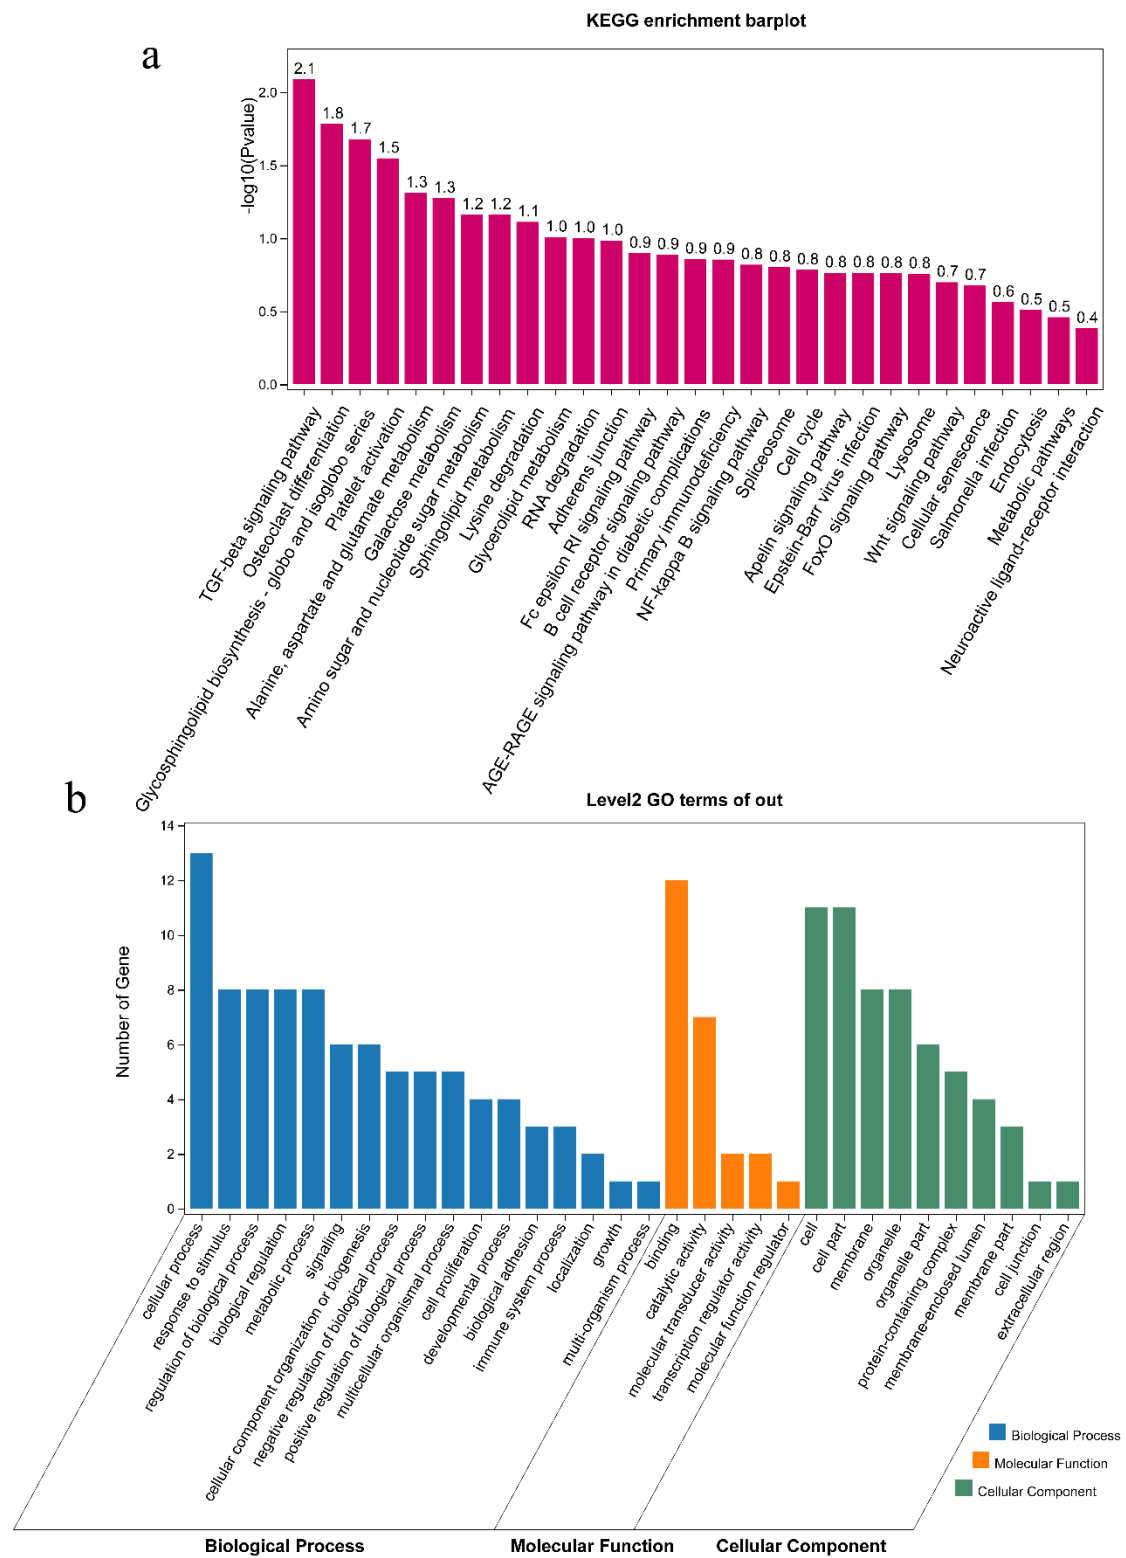

**Figure S4.** KEGG (a) and GO (b) enrichment analysis of gray plumage associate genes.

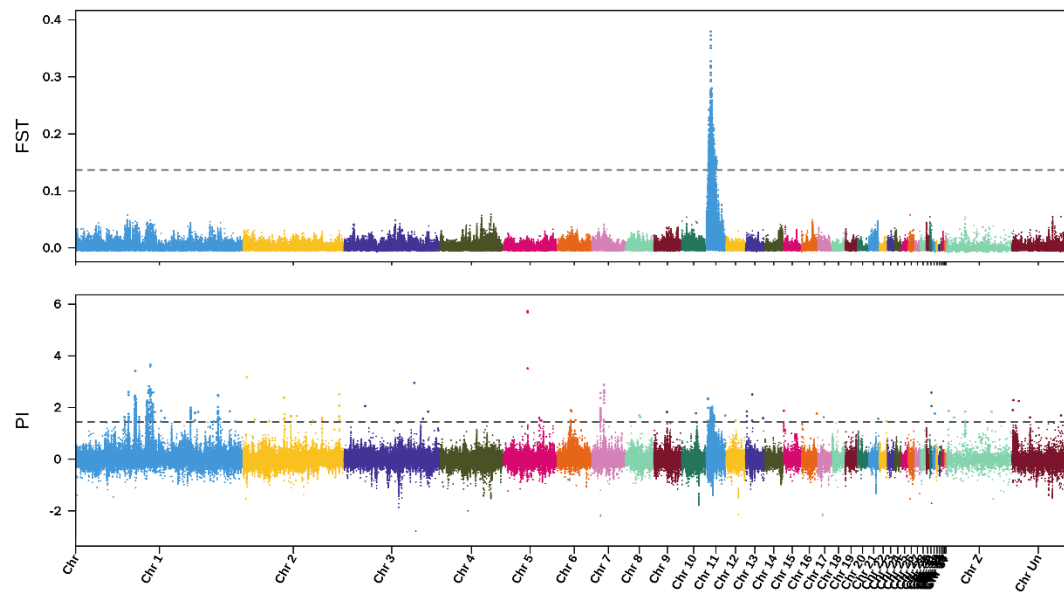

**Figure S5.** Genome-wide selective signals across white plumage duck based on global  $F_{ST}$  (top) and  $\log_2 \pi$  ratio (bottom).

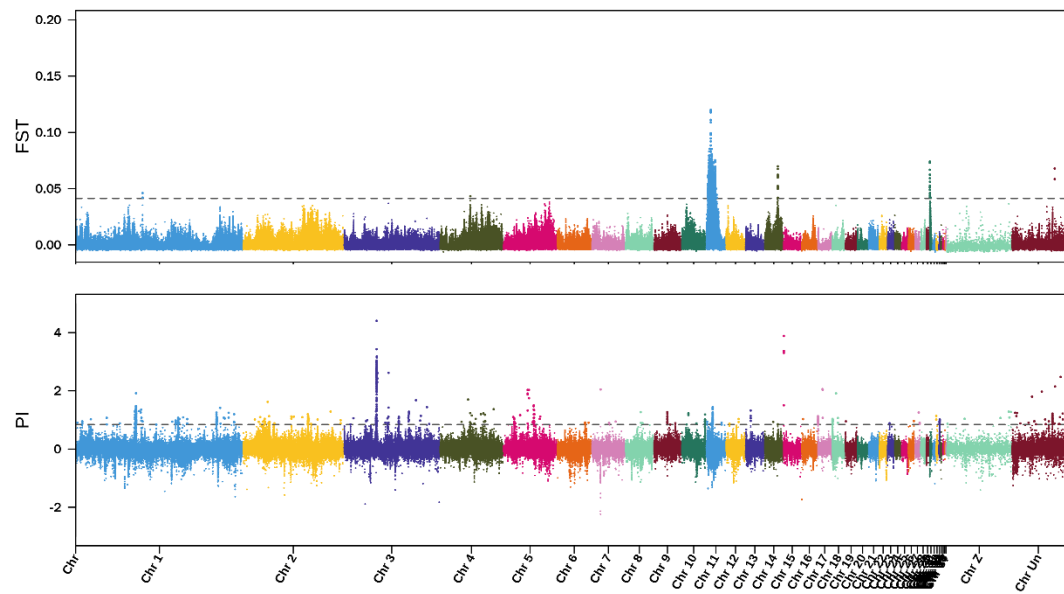

**Figure S6.** Genome-wide selective signals across spot plumage duck based on global  $F_{ST}$  (top) and  $\log_2 \pi$  ratio (bottom).

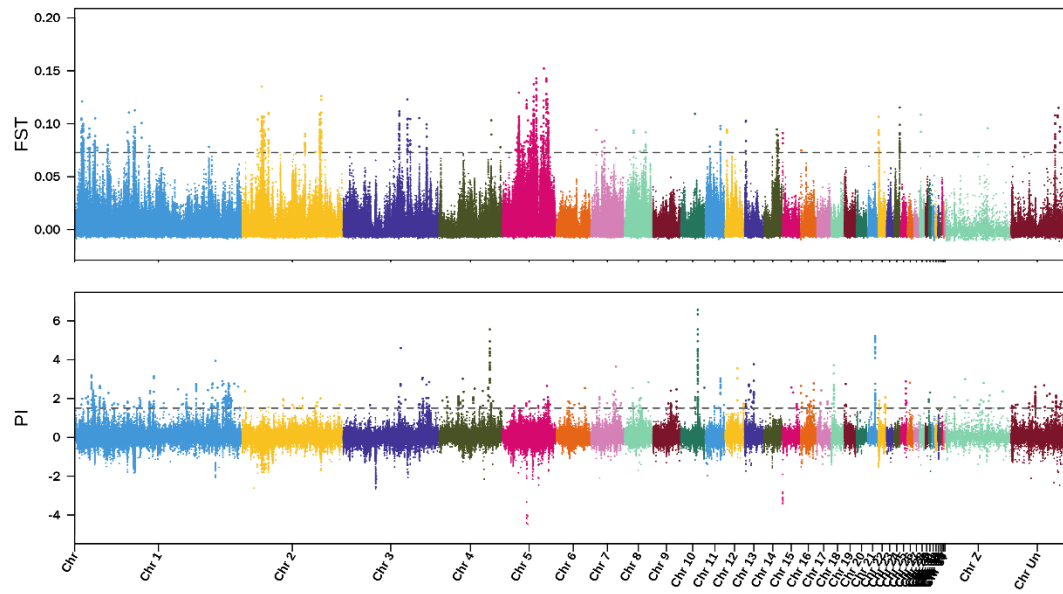

**Figure S7.** Genome-wide selective signals across gray plumage duck based on global  $F_{ST}$  (top) and  $\log_2 \pi$  ratio (bottom).

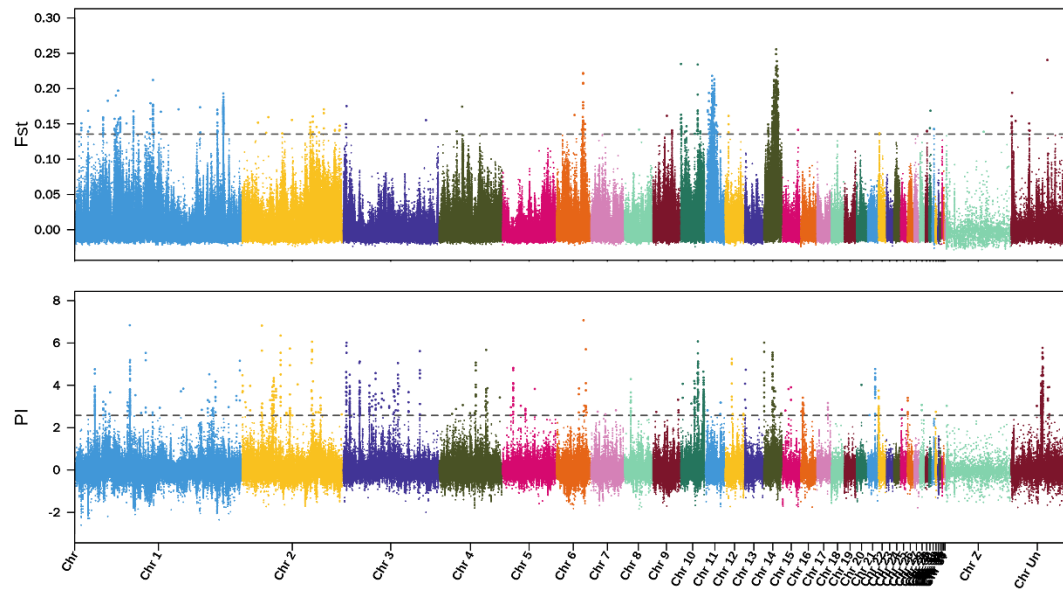

**Figure S8.** Genome-wide selective signals across black plumage duck based on global  $F_{ST}$  (top) and  $\log_2 \pi$  ratio (bottom).
